# Supplementary material
Source: publisher site journal article supplement (https://www.dovepress.com/article/146189)
Supplement: Supplementary file 1 [file get_supplementary_file.php]

**Table SE1: Inclusion and exclusion criteria**

| **Following were the inclusion criteria:** |
| --- |
| - Men and women aged ≥40 years, who have signed an informed consent form prior to initiation of any study-related procedure |
| - Patients diagnosed with stable COPD as per GOLD guidelines (GOLD 2013), and had a post-bronchodilator FEV1/FVC ratio of <0.70 and a post-bronchodilator FEV1 of ≥30% and <80% of predicted normal values at visit 2 |
| - Symptomatic patients defined as patients with CAT score ≥10 at visit 1 (screening). |
| - Current or ex-smokers who had a smoking history of at least 10 pack-years (10 pack-years were defined as 20 cigarettes a day for 10 years, or 10 cigarettes a day for 20 years etc.). An ex-smoker was defined as a subject who had not smoked for ≥6 months at visit 1 (screening) |
| - Patients on stable tiotropium (18 μg/day) monotherapy (tiotropium monotherapy + ICS was allowed) administered via HandiHaler® and adherent, with good device technique for at least 8 weeks before visit 1 (screening) |
| **Following were the exclusion criteria:** |
| - Patients who had a COPD exacerbation that required treatment with antibiotics, and/or systemic steroids and/or hospitalization in the 6 weeks prior to screening (visit 1) or during screening (patients were permitted to be rescreened after a minimum of 6 weeks after the resolution of the COPD exacerbation) |
| - Patients who had a respiratory tract infection within 6 weeks prior to screening (visit 1) or during screening were excluded (patients were permitted to be rescreened after a minimum of 6 weeks after the resolution of the COPD exacerbation) |
| - Patients with a negative response to bronchodilator reversibility test at visit 2 |
| - Patients with an onset of chronic respiratory symptoms, including a COPD diagnosis,   prior to age 40 years |
| - Patients with a body mass index >40 kg/m2 |
| - Patients who were receiving LABA or a PDE-4 inhibitor less than 8 weeks prior to visit 1 (screening), and those requiring long term oxygen therapy (>12 h a day) on a daily basis for chronic hypoxia |
| - Patients receiving any prohibited COPD related medications: LAMA, LABA, SAMA, SABA (except, rescue medication), corticosteroids, and xanthines were required to undergo washout before visit 2 |
| - Patients receiving following prohibited concomitant medications: tricyclic antidepressants, antipsychotics, serotonin norepinephrine reuptake inhibitors, monoamino-oxidase inhibitors, influenza vaccines, pneumococcal vaccines, macrolide antibiotics (unless for treating COPD exacerbations), mast cell stabilizers, noradrenaline reuptake inhibitors, leukotriene antagonists, leukotriene synthesis inhibitors, IgE inhibitors (Xolair), and systemic anticholinergics |
| - Patients unable to use a dry powder inhaler device, metered dose inhaler, or a pressurized metered dose inhaler, or to comply with the study regimen |
| - Use of other investigational drugs/devices (approved or unapproved) at the time of enrolment, or within 30 days or 5 half-lives of visit 1, whichever was longer |
| - Patients with allergic rhinitis who used a H1 antagonist or intra-nasal corticosteroids intermittently (treatment with a stable dose or regimen was permitted) |
| - Patients with any history of asthma, blood eosinophil count >600/mm3 (at screening), concomitant pulmonary disease, clinically significant bronchiectasis, diagnosis of α-1 anti-trypsin deficiency, active pulmonary tuberculosis, and pulmonary lobectomy or lung volume reduction surgery or lung transplantation |
| - Patients who had clinically significant renal, cardiovascular (such a myocardial infarctions and NYHA Class III/IV left ventricular failure), neurological, endocrine, immunological, psychiatric, gastrointestinal, hepatic, or hematological abnormalities |
| - Patients with narrow-angle glaucoma, symptomatic prostatic hyperplasia or bladder neck obstruction or urinary retention |
| - Patients with a history of malignancy of any organ system (including lung cancer), treated or untreated, within the past 5 years whether or not there was evidence of local recurrence or metastases, with the exception of localized basal cell carcinoma of the skin |
| - Patients with conditions contraindicated for treatment with, or having a history of reactions/hypersensitivity to any of the following inhaled drugs, drugs of a similar class or any component thereof: anticholinergics, LABA, SABA, sympathomimetic amines, lactose or any of the other excipients |
| - Women of child-bearing potential not using effective methods of contraception, pregnant or lactating mothers were excluded from the study |

**Table SE2: Prohibited medication during the trial1**

| **Class of Medication** | **Minimum cessation period prior to visit 2** |
| --- | --- |
| **Non-COPD related medication 2** |  |
| Non-potassium sparing diuretics (unless administered as a fixed-dose combination with a potassium conserving drug) | 7 days |
| Non-selective systemic beta-blocking agents | 7 days |
| Cardiac anti-arrhythmics Class Ia | 7 days |
| Cardiac anti-arrhythmics Class III | 7 days , amiodarone 3 months |
| Other drugs with potential to significantly prolong the QT  interval | 14 days or 5 half-lives, whichever is longer |
| Tricyclic antidepressants | 14 days |
| All antipsychotic agents (first, second and third  generation, inclusive of atypical antipsychotics) | 14 days |
| Combinations of anti-psychotic agents with  antidepressants are prohibited | - |
| Serotonin Norepinephrine Reuptake Inhibitors | 14 days |
| Monoamino-oxidase inhibitors | 14 days |
| Other investigational drugs | 30 days or 5 half-lives, whichever is longer |
| Live attenuated vaccine | 30 days |
| Inactivated influenza vaccination, pneumococcal  vaccination or any other inactivated vaccine 3 | 48 h |
| Macrolide antibiotics (except for the treatment of COPD  exacerbations) | 30 days |
| Systematic Mast cell stabilizers (e.g., cromoglycate,  nedocromil, ketotifen) | 7 days |
| Systemic anticholinergics | 7 days |
| IgE inhibitors (e.g., Xolair) | 6 months |
| Leukotriene antagonists and leukotriene synthesis inhibitors | 7 days |
| Noradrenaline reuptake inhibitors | 7 days |
| **COPD related medication4** |  |
| Long-acting anticholinergics | n.a. |
| Short acting anticholinergics5 | 8 h |
| Fixed combinations of long-acting β2 agonists and inhaled corticosteroids | 8 weeks |
| Fixed combinations of short-acting β2 agonists and short-acting anticholinergics5 | 8 h |
| Long-acting β2 agonists (LABA) | 8 weeks |
| Short-acting β2 agonists4 (other than study rescue  medication) | 6 h |
| Inhaled corticosteroids (intermittent use) | 14 days |
| Oral Phosphodiesterase-IV inhibitor | 8 weeks |
| Xanthines (any formulation) 7 days | 7 days |
| Parenteral or oral corticosteroids | 30 days |
| Intra-muscular depot corticosteroids | 3 months |

1This table is to be used as a guide only and not considered all-inclusive.

2Non COPD medications should be assessed for adherence to the indication, compatibility with the study aims, study medication, study related procedures, and other inclusion/exclusion criteria. The washout of these prohibited medications prior to the Visit 2 is not to be encouraged.

3Inactivated influenza vaccination, pneumococcal vaccination or any other inactivated vaccine should also not be taken within the 48 h before the screening or randomization visit (Visit 3).

4COPD related medications should be assessed for adherence to the indication and other inclusion/exclusion criteria. These medications are also prohibited if administered for other indications.

5 Please note appropriate washout times prior to spirometry testing

**Table SE3:** List of Health Authority and ethics committees/institutional review boards in the FAVOR study

| **Name** | **Address** |
| --- | --- |
| **Ethics committees** |  |
| 1. Medical Association Hesse   Ethics committee | Im Vogelsgesang 3  60488 Frankfurt am Main  Germany |
| 1. Ethics committee of the Bavarian Medical Association | Muehlbaurstraße 16  81677 München  Germany |
| 1. Office for Health and Social Affairs   Ethics committe Berlin | Fehrbelliner Platz 1  10707 Berlin  Germany |
| 1. Medical Association Lower Saxony   Ethics committee | Berliner Allee 20  30175 Hannover  Germany |
| 1. Medical Association North Rhine   Ethics committee | Schützenhöhe 16  01099 Dresden  Germany |
| 1. Medical Association Thueringia   Ethics committee | Im Semmicht 33  07751 Jena-Maua  Germany |
| 1. Ethics committee of the Medical Association Westfalen-Lippe and of the Medical Faculty of the Whestphalian Wilhelms-University Münster | Gartenstr. 210-214  48147 Münster  Germany |
| **Health Authority** |  |
| Federal Institute for Drugs and Medical Devices | Kurt-Georg-Kiesinger-Allee 3  53175 Bonn  Germany |

**Table SE4:** Patient/ Physician preference questionnaire

Based on your personal experience with indacaterol/glycopyrronium and tiotropium (Spiriva®) during this study, which medication would you prefer for future treatment?

□ indacaterol/glycopyrronium □ tiotropium

Please indicate the importance of the following reasons for your decision of preference.

|  | 1  very important | 2  important | 3  neutral | 4  unimportant | 5  very unimportant |
| --- | --- | --- | --- | --- | --- |
| 1. Reduced breathlessness due to the inhalation of the drug |  |  |  |  |  |
| 1. Less cough and/or less wheezing due to the inhalation of the drug |  |  |  |  |  |
| 1. Less sputum production due to the inhalation of the drug |  |  |  |  |  |
| 1. Reduced chest tightness due to the inhalation of the drug |  |  |  |  |  |
| 1. Fast onset of action |  |  |  |  |  |
| 1. Ease handling of the device |  |  |  |  |  |
| 1. Less side effects |  |  |  |  |  |

**Table SE5 :** Questionnaire for assessing patient reported satisfaction based on symptom relief

| How satisfied are you with the following: | 1  very satisfied | 2  satisfied | 3  neither satisfied nor dissatisfied | 4  dissatisfied | 5  very dissatisfied |
| --- | --- | --- | --- | --- | --- |
| 1. The way the medication relieves your breathlessness when resting? |  |  |  |  |  |
| 1. The way the medication relieves your breathlessness on exertion? |  |  |  |  |  |
| 1. The reduction of coughing by the medication? |  |  |  |  |  |
| 1. The reduction of wheezing by the medication? |  |  |  |  |  |
| 1. The reduction of sputum production by the medication? |  |  |  |  |  |
| 1. The reduction of chest tightness by the medication? |  |  |  |  |  |
| 1. The time the medication needs to work? |  |  |  |  |  |
| 1. The handling of the device? |  |  |  |  |  |
| 1. The amount of side effects? |  |  |  |  |  |
| 1. The overall medication? |  |  |  |  |  |

**Table SE6: Patients subjective reason for preferring indacaterol/glycopyrronium after experiencing both treatments (full analysis set)**

|  | **GOLD II** | | | | | | | | | **GOLD III** | | | | | | |
| --- | --- | --- | --- | --- | --- | --- | --- | --- | --- | --- | --- | --- | --- | --- | --- | --- |
| **Indacaterol/Glycopyrronium** | | | | **Tiotropium** | | | | | **Indacaterol/Glycopyrronium** | | | | **Tiotropium** | | |
| **Very satisfied** | **Satisfied** | | **Very satisfied** | | | **Satisfied** | | **Very satisfied** | | **Satisfied** | | **Very satisfied** | | **Satisfied** | |
| **Reduced breathlessness due to the inhalation of the drug** | 20 (60.6%) | 10 (30.3%) | | 5 (29.4%) | | | 7 (41.2%) | | 11 (45.8%) | | 12 (50.0%) | | 2 (25.0%) | | 4 (50.0%) | |
| **Less cough and/or less wheezing due to the inhalation of the drug** | 17 (51.5%) | 11 (33.3%) | | 4 (23.5%) | | | 7 (41.2%) | | 8 (33.3%) | | 12 (50%) | | 1 (12.5%) | | 5 (62.5%) | |
| **Less sputum production due to the inhalation of the drug** | 17 (51.5%) | 11 (33.3%) | | 6 (35.5%) | | | 4 (23.5%) | | 6 (25.0%) | | 13 (54.2%) | | 3 (37.5%) | | 3 (37.5%) | |
| **Reduced chest tightness due to the inhalation of the drug** | 18 (54.5%) | 9 (27.3%) | | 5 (29.4%) | | | 7 (41.2%) | | 10 (41.7%) | | 12 (50.0%) | | 5 (62.5%) | | 2 (25.0%) | |
| **Fast onset of action** | 14 (42.4%) | 16 (48.5%) | | 7 (41.2%) | | | 3 (17.6%) | | 7 (29.2%) | | 13 (54.2%) | | 3 (37.5%) | | 4 (50.0%) | |
| **Ease handling of the device** | 17 (51.5%) | 12 (36.4%) | | 4 (23.5%) | | | 10 (58.8%) | | 7 (29.2%) | | 15 (62.5%) | | 2 (25.0%) | | 4 (50.0%) | |
| **Less side effects** | 18 (54.5%) | 9 (27.3%) | | 7 (41.2%) | | | 5 (29.4%) | | 7 (29.2%) | | 15 (62.5%) | | 5 (62.5%) | | 2 (25.0%) | |
|  |  | |  | | |  | |  | |  | |  | |  | |  |

**Table SE7. Demographic and baseline characteristics by patient treatment preference (full analysis set)**

| **Variables** | **Missing  (N=3)** | **Preferring IND/GLY (N=59)** | **Preferring**  **Tiotropium  (N=26)** | **Total  (N=88)** |
| --- | --- | --- | --- | --- |
| **(Age, years** | 64.7 (3.8) | 64.6 (9.3) | 66.0 (10.7) | 65.0 (9.6) |
| **Gender, n (%)** |  |  |  |  |
| Men | 2 (66.7%) | 39 (66.1%) | 16 (61.5%) | 57 (64.8%) |
| **Race, n (%)** |  |  |  |  |
| Caucasian | 3 (100.0%) | 58 (98.3%) | 26 (100.0%) | 87 (98.9%) |
| **BMI, kg/m2** | 27.70 (7.36) | 26.33 (4.91) | 26.39 (4.52) | 26.39 (4.82) |
| **Smoking status, n (%)** |  |  |  |  |
| Current smoker | 2 (66.7%) | 33 (55.9%) | 10 (38.5%) | 45 (51.1%) |
| Ex-smoker | 1 (33.3%) | 26 (44.1%) | 16 (61.5%) | 43 (48.9%) |
| **FEV1 (% predicted) post-bronchodilator** | 61.77 (6.83) | 56.68 (14.94) | 59.45 (10.51) | 57.67 (13.56) |
| **CAT score** | 15.3 (3.79) | 18.4 (5.41) | 16.2 (5.21) | 17.6 (5.37) |
| **Duration of smoking, pack-years** | 40.3 (34.79) | 37.7 (18.18) | 38.6 (15.47) | 38.0 (17.81) |
| **Number of COPD exacerbations in the previous year, n (%)** |  |  |  |  |
| 1 | 0 (0.0%) | 10 (16.9%) | 5 (19.2%) | 15 (17.0%) |
| 0 | 3 (100.0%) | 49 (83.1%) | 21 (80.8%) | 73 (83.0%) |
| **Duration since first treatment with tiotropium (years)** | 1.73 (2.25) | 2.42 (2.39) | 2.91 (3.63) | 2.54 (2.79) |
| **Severity of COPD (as per GOLD 2010), n (%)** |  |  |  |  |
| Stage I | 0 (0.0%) | 2 (3.4%) | 1 (3.8%) | 3 (3.4%) |
| Stage II | 3 (100.0%) | 33 (55.9%) | 17 (65.4%) | 53 (60.2%) |
| Stage III | 0 (0.0%) | 24 (40.7%) | 8 (30.8%) | 32 (36.4%) |
| **Severity of COPD (as per GOLD 2015)a, n (%)** |  |  |  |  |
| Group B | 3 (100.0%) | 35 (59.3%) | 18 (69.2%) | 56 (63.6%) |
| Group D | 0 (0.0%) | 24 (40.7%) | 8 (30.8%) | 32 (36.4%) |
| Data are mean (standard deviation) unless otherwise stated.  aNone of the patients belonged to Group A and C.  BMI, body mass index; CAT, COPD assessment test; FEV1, forced expiratory volume in one second; IND/GLY, indacaterol/glycopyrronium | | | | |
